1 **Association of Marital/Partner Status with Hospital Readmission Among Young Adults**  
2 **With Acute Myocardial Infarction**

3

4 **Authors and Affiliations:**

5 Cenjing Zhu, MPhil<sup>1</sup>, Rachel P Dreyer, PhD<sup>2,3</sup>, Fan Li, PhD<sup>3,4</sup>, Erica S Spatz, MD, MHS<sup>1,5,6</sup>,

6 César Caraballo, MD<sup>5,6</sup>, Shiwani Mahajan, MBBS, MHS<sup>5</sup>, Valeria Raparelli, MD, PhD<sup>7,8</sup>,

7 Erica C Leifheit, PhD<sup>1</sup>, Yuan Lu, ScD<sup>5,6</sup>, Harlan M Krumholz, MD, SM<sup>5,9,10</sup>, John A Spertus,

8 MD, MPH<sup>11,12</sup>, Gail D’Onofrio, MD<sup>1,2</sup>, Louise Pilote, MD, MPH, PhD<sup>13,14</sup>, Judith H

9 Lichtman, PhD<sup>1</sup>

10

11 1. Department of Chronic Disease Epidemiology, Yale School of Public Health, New Haven,  
12 CT, USA

13 2. Department of Emergency Medicine, Yale School of Medicine, New Haven, CT, USA

14 3. Department of Biostatistics, Yale School of Public Health, New Haven, CT, USA

15 4. Center for Methods in Implementation and Preventive Science, Yale University, New  
16 Haven, CT, USA

17 5. Center for Outcomes Research and Evaluation, Yale University School of Medicine, New  
18 Haven, CT, USA

19 6. Section of Cardiovascular Medicine, Department of Internal Medicine, Yale School of  
20 Medicine, New Haven, CT, USA

21 7. Department of Translational Medicine, University of Ferrara, Ferrara, Italy

22 8. University Center for Studies on Gender Medicine, University of Ferrara, Ferrara, Italy

23 9. Department of Cardiology, Yale School of Medicine, New Haven, CT, USA

24 10. Department of Health Policy and Management, Yale School of Public Health, New  
25 Haven, CT, USA

**NOTE: This preprint reports new research that has not been certified by peer review and should not be used to guide clinical practice.**

26 11. Healthcare Institute for Innovations in Quality, University of Missouri – Kansas City,  
27 Missouri, USA

28 12. Saint Luke’s Cardiovascular Outcomes Research, Saint Luke’s Mid America Heart  
29 Institute, Kansas City, Missouri, USA

30 13. Center for Outcomes Research and Evaluation, Research Institute, McGill University  
31 Health Centre, Montreal, Quebec, Canada

32 14. Research Institute of the McGill University Health Centre, Montreal, Quebec, Canada

33

34 **Correspondence to:**

35 Judith H Lichtman

36 Department of Chronic Disease Epidemiology, Yale School of Public Health

37 60 College Street, New Haven, CT 06510

38 Email: [judith.lichtman@yale.edu](mailto:judith.lichtman@yale.edu)

39 Tel: 203-785-3025

40

41 **Short Title:** Marital/Partner Status and 1-year Readmission in Young Adults with AMI

42 **Non-standard Abbreviations and Acronyms:** AMI (acute myocardial infarction); VIRGO

43 (Variation in Recovery: Role of Gender on Outcomes of Young AMI Patients)

44

45

46 **Word Count: 3905**

47

48 **ABSTRACT**

49 **Introduction:** Despite evidence supporting the benefits of marriage on cardiovascular health,  
50 the impact of marital/partner status on the long-term readmission of young acute myocardial  
51 infarction (AMI) survivors is less clear. We aimed to examine the association between  
52 marital/partner status and 1-year all-cause readmission, and explore sex differences, among  
53 young AMI survivors.

54 **Methods:** Data were from the VIRGO study (Variation in Recovery: Role of Gender on  
55 Outcomes of Young AMI Patients), which enrolled young adults aged 18-55 years with AMI  
56 (2008-2012). The primary end point was all-cause readmission within 1 year of hospital  
57 discharge, obtained from medical record, patient interviews, and adjudicated by a physician  
58 panel. We performed Cox proportional hazards models with sequential adjustment for  
59 demographic, socioeconomic, clinical and psychosocial factors. Sex-marital/partner status  
60 interaction was also tested.

61 **Results:** Of the 2,979 adults with AMI (2002 women [67.2%]; mean age 48 [interquartile  
62 range, 44-52] years), unpartnered individuals were more likely to experience all-cause  
63 readmissions compared with married/partnered individuals within the first year after hospital  
64 discharge (34.6% versus 27.2%, hazard ratio [HR]=1.31; 95% confidence interval [CI], 1.15-  
65 1.49). The association attenuated but remained significant after adjustment for demographic  
66 and socioeconomic factors (adjusted HR, 1.16; 95%CI, 1.01-1.34), and was not significant  
67 after further adjusting for clinical factors and psychosocial factors (adjusted HR, 1.10;  
68 95%CI, 0.94-1.28). Sex-marital/partner status interaction was not significant (p=0.69).  
69 Sensitivity analysis using data with multiple imputation, and restricting outcomes to cardiac  
70 readmission yielded comparable results.

71 **Conclusions:** In a cohort of young adults aged 18-55 years, unpartnered status was  
72 associated with 1.3-fold increased risk of all-cause readmission within 1 year of AMI  
73 discharge. Further adjustment for demographic, socioeconomic, clinical and psychosocial  
74 factors attenuated the association, suggesting that these factors may explain disparities in  
75 readmission between married/partnered versus unpartnered young adults. Whereas young  
76 women experienced more readmission compared to similar-aged men, the association  
77 between marital/partner status and 1-year readmission did not vary by sex.

78

79 **Key Words:** acute myocardial infarction; marital status; young adults; all-cause readmission

80

## 81 **Introduction**

82           Despite an overall reduction in cardiovascular disease (CVD) prevalence and acute  
83 myocardial infarction (AMI) mortality,(1) rates of AMI hospitalization in young adults ( $\leq 55$   
84 years) have increased over the last two decades.(2) Hospital readmission remains frequent  
85 across all age groups of AMI survivors, with an overall 24% readmission rate within 90 days  
86 post-AMI.(3) In a recent study of US young adults with AMI, about one-third had at least 1  
87 hospitalization in the year after discharge, and young women experienced more adverse  
88 events than men.(4) Risk profile for readmission among younger and older patients may be  
89 different, as suggested by a study using data from the 2013 National Readmission Database,  
90 where the effect of sex was more prominent in the younger age group.(3) Socio-demographic  
91 and psychosocial characteristics have been suggested to play important roles in predicting the  
92 risk of 1-year readmission for younger adults with AMI,(5) yet little is known about the  
93 impact of marital/partner status on their long-term risk of readmission.

94           Marriage has long been known to offer cardiovascular health benefits, including its  
95 association with lower risk of AMI incidence,(6) in-hospital and long-term mortality,(7–10)  
96 and recurrent events.(11–13) Committed relationships that are not based on formal legal  
97 unions, such as domestic partners and common-law marriages may also convey benefits, but  
98 are less commonly described in prior studies.(7,9,10,12) Moreover, prior research has largely  
99 focused on older populations, been conducted in foreign countries, and has not explored  
100 readmission beyond the first month of discharge.(11,12) There is a paucity of data on the  
101 impact of marital/partner status on the long-term readmission outcomes of younger AMI  
102 patients. In addition, although evidence suggest that women may not benefit from marriage to  
103 the same extent as men regarding mortality outcomes(14,15), less is known about whether  
104 there are sex differences in the degree of “protection” conferred by marriage/partnership in a  
105 younger population with AMI and as assessed by hospital readmission.

106 To address this gap in knowledge, we examined the association between  
107 marital/partner status and all-cause and cardiac readmission within 1 year of hospital  
108 discharge among a cohort of AMI survivors 18-55 years of age in the United States. A  
109 secondary aim was to explore potential subgroup differences in the association by sex.

110

## 111 **Materials and Methods**

### 112 *Study Population*

113 We used data from the VIRGO study (Variation in Recovery: Role of Gender on  
114 Outcomes of Young AMI Patients), the largest prospective, multicenter cohort study  
115 designed to understand factors associated with adverse outcomes in younger adults ( $\leq 55$   
116 years) with AMI.(16) Between August 21, 2008 and May 1, 2012, a total of 2,979  
117 participants were recruited from 103 US hospitals using a 2:1 female-to-male enrollment  
118 design. The methodology of VIRGO has been described elsewhere.(16) In brief, eligible  
119 participants had elevated cardiac enzymes (troponin or creatine kinase, with at least one of  
120 these biomarkers  $>99^{\text{th}}$  percentile of the upper reference limit) at the recruiting center within  
121 24 hours of admission, and presented with other evidence supporting the diagnosis of AMI,  
122 including either symptoms of ischemia or electrocardiogram changes indicative of new  
123 ischemia (new ST-T changes, new or presumably new left bundle branch block, or the  
124 development of pathological Q waves). Patients were excluded if their elevated cardiac  
125 markers were due to a complication of elective coronary revascularization, or their AMI was  
126 caused by physical trauma. Individuals were ineligible if they were incarcerated, did not  
127 speak English or Spanish, or were unable to provide informed consent or be contacted for  
128 follow-up.

129 This study followed the Strengthening the Reporting of Observational Studies in  
130 Epidemiology (STROBE) reporting guideline (**Appendix in the Supplement**). De-identified

131 data were used for the current study. Institutional review board approval was obtained at each  
132 participating institution, and individuals provided written informed consent for their study  
133 participation.

134

### 135 *Assessment of Marital/Partner Status and Other Covariates*

136 Baseline data were collected by medical chart abstraction and standardized in-person  
137 interviews administered by trained personnel during the index AMI admission.

138 Marital/Partner status was collected during patient enrollment interview through a question of  
139 “Which best describes your current marital status” and was categorized into  
140 “married/partnered” (having a response of “married” or “living as married/living with  
141 partner” or “unpartnered” (having a response of “divorced”, “separated”, “widowed”, or  
142 “single”). In a secondary analysis, “unpartnered” status was further classified into  
143 “divorced/separated”, “widowed”, or “single”.

144 Demographic factors included sex (male/female), age (year, continuous), and self-  
145 reported race (non-Hispanic white/non-Hispanic black/Hispanic/other [ie, American Indian or  
146 Alaska Native and Asian or Pacific Islander]). Socioeconomic factors included education  
147 level, financial strain, employment status, and health insurance. Education level was  
148 categorized into less than high school, some high school, and more than high school.  
149 Financial strain was defined as having “just enough to make ends meet” or “not enough to  
150 make ends meet” (versus having some money left over) based on individuals’ response to the  
151 question “In general, how do your finances usually work out at the end of the month”.

152 Clinical characteristics considered in our study included cardiac risk factors  
153 (hypertension, dyslipidemia, diabetes, obesity, current smoker, and alcohol abuse), medical  
154 history (prior CVD [AMI, percutaneous coronary intervention, coronary artery bypass  
155 grafting, angina, heart failure, stroke, transient ischemic attack or peripheral artery disease],

156 renal dysfunction, and history of chronic obstructive pulmonary disease [COPD]), and  
157 disease severity (type of AMI [ST-elevation myocardial infarction/non-ST-elevated  
158 myocardial infarction], ejection fraction <40%, and hospital length of stay).

159 Psychosocial factors, including depression, low social support, and high stress burden,  
160 were assessed at baseline by validated measures or questionnaires respectively. Depressive  
161 symptoms were measured using the 9-item version of the Patient Health Questionnaire,(17)  
162 with an overall score of 10 or more indicating depression. Social support was measured using  
163 the 5-item Enhancing Recovery in Coronary Heart Disease Social Support Inventory.(18)  
164 Low social support was defined as a score of 3 or less on at least 2 Social Support Instrument  
165 items and a total score of 18 or less.(19) High stress burden was captured by answering  
166 “Fairly often” or “Very often” to the 14-item Perceived Stress Scale(20) question “In the last  
167 month, how often have you felt nervous and stressed?”

168

### 169 ***Collection and Adjudication of Hospital Readmission***

170 The primary end point of this study is all-cause readmission within 1 year of hospital  
171 discharge. During the 1-year follow-up period, hospital readmissions were identified by the  
172 research coordinators at each site from medical record and self-report. The VIRGO  
173 adjudication process was supported through the use of a custom-developed Research  
174 Electronic Data Capture external module.(21) Adjudications of all-cause and cardiac  
175 readmission were completed by five physicians and an advanced practice registered nurse at  
176 Yale University who received extensive training and clear guidelines. Detailed process has  
177 been described elsewhere.(5) In sensitivity analysis, we restricted outcomes to cardiac  
178 readmission and results remained consistent.

179

### 180 ***Statistical Analysis***



181 Baseline characteristics were compared between married/partnered versus  
182 unpartnered participants, overall and by sex, using  $\chi^2$  test for dichotomous variables and  
183 Wilcoxon's rank-sum test for continuous variables that don't follow a normal distribution.  
184 All variables had minimal missing values (<5%) except for financial strain (11%). In  
185 sensitivity analysis, multiple imputation by chained equations was applied to generate 10  
186 imputed datasets on which estimates were calculated and pooled by the Rubin's rule.(22)  
187 Modeling was performed both with and without the imputation of missing values and because  
188 results were almost identical, we reported the complete case analysis in the main paper and  
189 presented the results from multiple imputation in **eTable 1** in the **Supplement**.

190 Time to readmission was compared between married/partnered and unpartnered  
191 groups using the log-rank test. To examine the independent association of marital/partner  
192 status with all-cause readmission over the subsequent 1 year after AMI, multivariable Cox  
193 proportional hazard models sequentially adjusted for 4 domains of covariates including  
194 demographics (age, sex, race), socioeconomic factors (education level, financial strain,  
195 employment status, and health insurance), clinical characteristics (cardiovascular risk factors,  
196 medical history and disease severity), and psychosocial factors (depression, low social  
197 support, high stress burden). Covariates adjusted in the multivariable models were selected  
198 using a combination of clinical judgement and insights from previous literature,(5,23,24)  
199 with a detailed variable selection procedure described elsewhere.(5) Two-way interaction  
200 between marital/partner status and sex was also tested in the fully-adjusted model using the  
201 Wald  $\chi^2$  test. The proportional hazard assumption was checked by Schoenfeld residual with a  
202 global test  $p>0.05$  indicating no violation.

203 Due to competing risk from non-cardiac readmissions, in the sensitivity analysis,  
204 Fine-Gray competing risk model were applied to examine the association between  
205 marital/partner status with the cumulative incidence of cardiac readmission within 1-year post

206 discharge. The same set of covariates considered in the Cox model were adjusted for in the  
207 Fine-Gray model.

208 All statistical analyses were conducted using R (Version 1.4.1106), with 2-tailed tests  
209 for statistical significance indicated by  $P=0.05$ . Data analysis was performed from February  
210 to July 2022.

211

## 212 Results

213 Among the 2,979 participants 18-55 years of age (median age 48 years, interquartile  
214 range 44-52), 42.8% were unpartnered (781 divorced/separated, 91 widowed, 423 single;  
215 47% for women and 37.2% for men). Baseline characteristics are presented in **Table 1**.  
216 During the first year of follow-up, 904 patients had  $\geq 1$  all-cause readmission (50.3% were  
217 married), 641 had  $\geq 1$  cardiac readmission (50.2% were married). Overall, compared to  
218 married/partnered individuals, those who were unpartnered had higher risk of all-cause  
219 readmission throughout the first year of recovery (**Figure 1A**). When further stratified by sex,  
220 married male had the lowest risk, while unmarried female had the highest (**Figure 1B**).  
221

**Figure 1 Kaplan Meier curves for time to all-cause readmission**

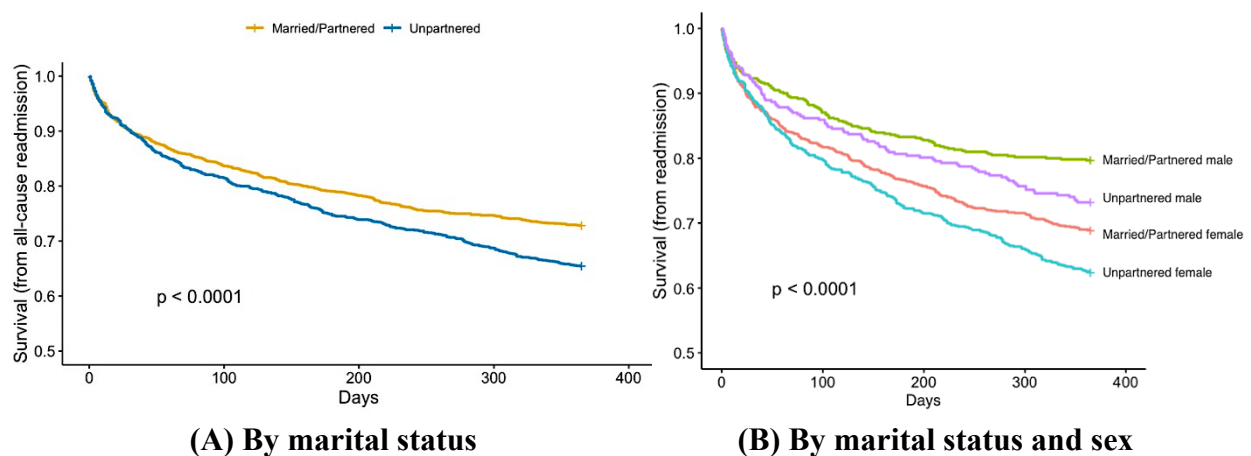

222

223 In multivariable analyses, compared with being married/partnered, being unpartnered  
 224 was associated with a 24% higher risk of all-cause readmission after adjustment for  
 225 demographic factors (age, sex and race) (aHR, 1.24; 95%CI, 1.08-1.42). The association  
 226 attenuated after further adjusting for socioeconomic factors (education, financial strain,  
 227 employment, insurance) (aHR, 1.16; 95%CI, 1.01-1.34), and further attenuated and became  
 228 not statistically significant after adjusting for clinical factors (aHR, 1.11; 95%CI, 0.96-1.29)  
 229 and psychosocial factors (aHR, 1.10; 95%CI, 0.94-1.28). Variables that were significant in  
 230 the fully adjusted model include female sex, age, Hispanic race, financial strain,  
 231 unemployment, diabetes, prior CVD, COPD, total length of stay, and depression. Details of  
 232 the model output can be found in **Table 2**.

233

234 **Table 1. Baseline characteristics of the study participants by marital/partner status and**  
 235 **sex**

|                              | Married/Partnered (N=1675) |                   |         | Unpartnered (N=1299) |                  |         | P-value<br>(unpartnered<br>vs.<br>married/partnered) |
|------------------------------|----------------------------|-------------------|---------|----------------------|------------------|---------|------------------------------------------------------|
|                              | Men<br>(n=610)             | Women<br>(n=1065) | p-value | Men<br>(n=362)       | Women<br>(n=937) | p-value |                                                      |
| <i>Demographics</i>          |                            |                   |         |                      |                  |         |                                                      |
| Age (Median [q1, q3])        | 48 [44, 52]                | 48 [44, 52]       | 0.898   | 48 [43, 51]          | 48 [44, 52]      | 0.085   | 0.259                                                |
| Race                         |                            |                   | 0.319   |                      |                  | <0.001  | <0.001                                               |
| Non-Hispanic white           | 476 (78.0%)                | 813 (76.3%)       |         | 252 (69.6%)          | 532 (56.8%)      |         |                                                      |
| Non-Hispanic black           | 53 (8.7%)                  | 134 (12.6%)       |         | 52 (14.4%)           | 275 (29.3%)      |         |                                                      |
| Hispanic                     | 43 (7.0%)                  | 64 (6.0%)         |         | 39 (10.8%)           | 87 (9.3%)        |         |                                                      |
| Other                        | 38 (6.2%)                  | 54 (5.1%)         |         | 19 (5.2%)            | 43 (4.6%)        |         |                                                      |
| <i>Socioeconomic factors</i> |                            |                   |         |                      |                  |         |                                                      |
| Education level              |                            |                   | 0.148   |                      |                  | 0.005   | 0.007                                                |
| Less than high school        | 10 (1.6%)                  | 18 (1.7%)         |         | 6 (1.7%)             | 24 (2.6%)        |         |                                                      |
| Some high school             | 220 (36.1%)                | 435 (40.8%)       |         | 183 (50.6%)          | 383 (40.9%)      |         |                                                      |
| More than high school        | 376 (61.6%)                | 605 (56.8%)       |         | 169 (46.7%)          | 523 (55.8%)      |         |                                                      |
| Financial strain             |                            |                   | <0.001  |                      |                  | 0.029   | <0.001                                               |

|                                                                                     |             |             |        |             |             |        |        |
|-------------------------------------------------------------------------------------|-------------|-------------|--------|-------------|-------------|--------|--------|
| Yes                                                                                 | 340 (55.7%) | 686 (64.4%) |        | 254 (70.2%) | 729 (77.8%) |        |        |
| No                                                                                  | 212 (34.8%) | 279 (26.2%) |        | 55 (15.2%)  | 97 (10.4%)  |        |        |
| Missing                                                                             | 58 (9.5%)   | 100 (9.4%)  |        | 53 (14.6%)  | 111 (11.8%) |        |        |
| <b>Employment status</b>                                                            |             |             | <0.001 |             |             | 0.075  | <0.001 |
| Unemployed                                                                          | 124 (20.3%) | 434 (40.8%) |        | 145 (40.1%) | 440 (47.0%) |        |        |
| Employed                                                                            | 483 (79.2%) | 631 (59.2%) |        | 217 (59.9%) | 495 (52.8%) |        |        |
| <b>Health insurance</b>                                                             |             |             | 0.964  |             |             | <0.001 | <0.001 |
| No                                                                                  | 104 (17.0%) | 187 (17.6%) |        | 137 (37.8%) | 246 (26.3%) |        |        |
| Yes                                                                                 | 504 (82.6%) | 874 (82.1%) |        | 221 (61.0%) | 690 (73.6%) |        |        |
| <b>Clinical factors(cardiac risk factors and medical history, disease severity)</b> |             |             |        |             |             |        |        |
| <b>Hypertension</b>                                                                 | 378 (62.0%) | 659 (61.9%) | 0.999  | 249 (68.8%) | 687 (73.3%) | 0.264  | <0.001 |
| <b>High cholesterol</b>                                                             | 563 (92.3%) | 889 (83.5%) | <0.001 | 340 (93.9%) | 787 (84.0%) | <0.001 | 0.997  |
| <b>Diabetes</b>                                                                     | 152 (24.9%) | 379 (35.6%) | <0.001 | 107 (29.6%) | 417 (44.5%) | <0.001 | <0.001 |
| <b>Obesity</b>                                                                      | 300 (49.2%) | 545 (51.2%) | 0.735  | 164 (45.3%) | 562 (60.0%) | <0.001 | 0.013  |
| <b>Physical inactivity</b>                                                          | 163 (26.7%) | 361 (33.9%) | 0.009  | 132 (36.5%) | 373 (39.8%) | 0.575  | <0.001 |
| <b>Current smoker</b>                                                               | 210 (34.4%) | 338 (31.7%) | 0.529  | 80 (22.1%)  | 263 (28.1%) | 0.091  | <0.001 |
| <b>Alcohol abuse</b>                                                                | 282 (46.2%) | 287 (26.9%) | <0.001 | 173 (47.8%) | 266 (28.4%) | <0.001 | 0.994  |
| <b>Prior cardiovascular disease</b>                                                 | 189 (31.0%) | 348 (32.7%) | 0.775  | 128 (35.4%) | 367 (39.2%) | 0.448  | 0.003  |
| <b>Renal dysfunction</b>                                                            | 41 (6.7%)   | 111 (10.4%) | 0.040  | 42 (11.6%)  | 142 (15.2%) | 0.254  | <0.001 |
| <b>COPD</b>                                                                         | 31 (5.1%)   | 130 (12.2%) | <0.001 | 31 (8.6%)   | 153 (16.3%) | 0.002  | <0.001 |
| <b>Type pf AMI</b>                                                                  |             |             | <0.001 |             |             | <0.001 | 0.417  |
| STEMI                                                                               | 351 (57.5%) | 501 (47.0%) |        | 212 (58.6%) | 417 (44.5%) |        |        |
| NSTEMI                                                                              | 259 (42.5%) | 564 (53.0%) |        | 150 (41.4%) | 520 (55.5%) |        |        |
| <b>EF&lt;40%</b>                                                                    |             |             | 0.259  |             |             | 0.033  | 0.333  |
| Yes                                                                                 | 60 (9.8%)   | 132 (12.4%) |        | 48 (13.3%)  | 79 (8.4%)   |        |        |
| No                                                                                  | 535 (87.7%) | 898 (84.3%) |        | 304 (84.0%) | 830 (88.6%) |        |        |
| <b>Length of stay (Median [q1, q3])</b>                                             | 3 [2, 4]    | 3 [2, 4]    | 0.178  | 3 [2, 4]    | 3 [2, 5]    | 0.02   | 0.009  |
| <b>Psychosocial factors</b>                                                         |             |             |        |             |             |        |        |
| <b>Depression</b>                                                                   | 108 (17.7%) | 362 (34.0%) | <0.001 | 103 (28.5%) | 390 (41.6%) | <0.001 | <0.001 |
| <b>High stress burden</b>                                                           | 211 (34.6%) | 554 (52.0%) | <0.001 | 156 (43.1%) | 531 (56.7%) | <0.001 | <0.001 |
| <b>Low social support</b>                                                           | 82 (13.4%)  | 172 (16.2%) | 0.341  | 130 (35.9%) | 253 (27.0%) | 0.007  | <0.001 |
| <b>1-year readmission outcomes</b>                                                  |             |             |        |             |             |        |        |
| <b>All-cause readmission</b>                                                        | 124 (20.3%) | 331 (31.1%) | <0.001 | 97 (26.8%)  | 352 (37.6%) | 0.001  | <0.001 |
| <b>Cardiac readmission</b>                                                          | 94 (15.4%)  | 228 (21.4%) | 0.001  | 78 (21.5%)  | 241 (25.7%) | 0.293  | 0.002  |

236

237 **Table 2. Multivariable Cox regression models output**

|                                                                                       | <b>Model1</b><br><b>(R<sup>2</sup>=4.7%)</b> | <b>Model2</b><br><b>(R<sup>2</sup>=9.1%)</b> | <b>Model3</b><br><b>(R<sup>2</sup>=15%)</b> | <b>Model 4</b><br><b>(R<sup>2</sup>=16%)</b> |
|---------------------------------------------------------------------------------------|----------------------------------------------|----------------------------------------------|---------------------------------------------|----------------------------------------------|
| <b>Marital status (Unpartnered vs. Married/Partnered)</b>                             | 1.24 (1.08-1.42) *                           | 1.16 (1.01-1.34) *                           | 1.11 (0.96-1.29)                            | 1.10 (0.94-1.28)                             |
| <b>Demographics</b>                                                                   |                                              |                                              |                                             |                                              |
| Female sex                                                                            | 1.52 (1.31-1.78) *                           | 1.43 (1.21-1.69) *                           | 1.36 (1.14-1.62) *                          | 1.26 (1.05-1.51) *                           |
| Age, year                                                                             | 0.99 (0.98-1.00)                             | 0.99 (0.98-1)                                | 0.98 (0.97-0.99) *                          | 0.98 (0.97-0.99) *                           |
| Race (ref: non-Hispanic white)                                                        | -                                            | -                                            | -                                           | -                                            |
| Non-Hispanic black                                                                    | 1.22 (1.04-1.44) *                           | 1.18 (0.98-1.4)                              | 1.15 (0.95-1.38)                            | 1.19 (0.98-1.44)                             |
| Hispanic                                                                              | 0.66 (0.50-0.88) *                           | 0.70 (0.52-0.95) *                           | 0.64 (0.47-0.88) *                          | 0.62 (0.45-0.87) *                           |
| Other race/ethnicity                                                                  | 0.84 (0.61-1.17)                             | 0.89 (0.63-1.26)                             | 0.87 (0.61-1.25)                            | 0.91 (0.63-1.32)                             |
| <b>Socioeconomic factors</b>                                                          |                                              |                                              |                                             |                                              |
| Education (ref: less than high school)                                                |                                              | -                                            | -                                           | -                                            |
| Some high school                                                                      |                                              | 0.91 (0.55-1.51)                             | 1.04 (0.61-1.78)                            | 0.97 (0.56-1.68)                             |
| More than high school                                                                 |                                              | 0.86 (0.52-1.44)                             | 1.00 (0.58-1.70)                            | 0.93 (0.53-1.61)                             |
| Financial strain                                                                      |                                              | 1.41 (1.15-1.72) *                           | 1.32 (1.08-1.63) *                          | 1.33 (1.07-1.64) *                           |
| Unemployment                                                                          |                                              | 1.49 (1.30-1.72) *                           | 1.30 (1.11-1.54) *                          | 1.30 (1.10-1.52) *                           |
| No health insurance                                                                   |                                              | 1.23 (1.04-1.47) *                           | 1.12 (0.93-1.34)                            | 1.14 (0.95-1.37)                             |
| <b>Clinical factors (Cardiac risk factors, medical history, and disease severity)</b> |                                              |                                              |                                             |                                              |
| Hypertension                                                                          |                                              |                                              | 1.05 (0.88-1.25)                            | 1.01 (0.84-1.21)                             |
| High cholesterol                                                                      |                                              |                                              | 1.13 (0.89-1.42)                            | 1.08 (0.85-1.37)                             |
| Diabetes                                                                              |                                              |                                              | 1.31 (1.12-1.54) *                          | 1.33 (1.13-1.56) *                           |
| Obesity                                                                               |                                              |                                              | 0.89 (0.77-1.04)                            | 0.88 (0.75-1.02)                             |
| Physical inactivity                                                                   |                                              |                                              | 1.08 (0.93-1.25)                            | 1.05 (0.9-1.23)                              |
| Current smoking                                                                       |                                              |                                              | 1.07 (0.91-1.27)                            | 1.11 (0.93-1.31)                             |
| Alcohol abuse                                                                         |                                              |                                              | 0.96 (0.82-1.13)                            | 0.98 (0.83-1.16)                             |
| Prior cardiovascular disease                                                          |                                              |                                              | 1.23 (1.06-1.44) *                          | 1.22 (1.03-1.43) *                           |
| Renal dysfunction                                                                     |                                              |                                              | 1.19 (0.96-1.47)                            | 1.23 (0.99-1.52)                             |
| COPD                                                                                  |                                              |                                              | 1.35 (1.11-1.65) *                          | 1.32 (1.07-1.62) *                           |
| STEMI                                                                                 |                                              |                                              | 1.00 (0.87-1.16)                            | 1.04 (0.89-1.21)                             |
| Ejection Fraction <40%                                                                |                                              |                                              | 0.92 (0.73-1.16)                            | 0.89 (0.7-1.13)                              |
| Total length of stay                                                                  |                                              |                                              | 1.03 (1.02-1.05) *                          | 1.03 (1.01-1.05) *                           |

| <i>Psychosocial factors</i> |  |  |  |                    |
|-----------------------------|--|--|--|--------------------|
| Depression                  |  |  |  | 1.35 (1.13-1.61) * |
| Low social support          |  |  |  | 0.97 (0.81-1.16)   |
| High stress burden          |  |  |  | 1.07 (0.91-1.26)   |

238

239 \*p<0.05 indicating statistical significance.

240 Note: Model 1 adjusted for demographics; Model 2 adjusted for demographics and socioeconomic factors; Model 3 adjusted for

241 demographics, socioeconomic, and clinical factors. Model 4 adjusted for demographic, socioeconomic, clinical and psychosocial factors.

242 Covariates were pre-selected based on prior literature and clinical implications. Interaction between marital/partner status and sex was tested

243 and was not significant in the fully adjusted models (p=0.628). Fully adjusted model does not violate the proportional hazard assumption

244 (global p>0.05).

245

246 In the fully adjusted model, the two-way interaction between marital/partner status

247 and sex was not significant (p=0.628). To provide additional information on the direction of

248 the interaction, the fully adjusted models were also stratified by sex. Details of the sex-

249 specific models output can be found in **eTable 2** in the **Supplement**.

250 Sensitivity analysis using data with multiple imputation, and restricting outcomes to

251 cardiac readmission yielded comparable results (**eTable 1** and **eTable 3** in the **Supplement**).

252 In the fully adjusted model with imputed data, no health insurance was also associated with

253 all-cause readmission. When restricting outcomes to cardiac readmission using the Fine-Gray

254 model, financial strain and depression were no longer significant in the fully adjusted model.

255 In a secondary analysis further classifying unpartnered participants into

256 divorces/separated, widowed, and single subgroups, similar pattern was found among

257 divorced/separated individuals as compared to the overall unpartnered group; widowed

258 individuals had the highest risk of all-cause readmission, yet the association was not

259 statistically significant due to the small size of widowed participants in current study; no

260 association was found among single individuals. (**Table 3**)

261

262 **Table 3. Association between marital/partner status subgroup and all-cause**  
263 **readmission**

|                                 | <b>Model 1</b>     | <b>Model 2</b>     | <b>Model 3</b>   | <b>Model 4</b>   |
|---------------------------------|--------------------|--------------------|------------------|------------------|
| <b>Married/Partnered (1675)</b> | ref                | ref                | ref              | Ref              |
| <b>Unpartnered (1299)</b>       | 1.24 (1.08-1.42) * | 1.16 (1.01-1.34) * | 1.11 (0.96-1.29) | 1.10 (0.94-1.28) |
| <b>Divorced/Separated (781)</b> | 1.26 (1.08-1.46) * | 1.20 (1.02-1.41) * | 1.17 (0.98-1.38) | 1.15 (0.96-1.37) |
| <b>Widowed (91)</b>             | 1.39 (0.99-1.95)   | 1.29 (0.91-1.84)   | 1.09 (0.76-1.57) | 1.04 (0.72-1.51) |
| <b>Single (423)</b>             | 1.17 (0.96-1.43)   | 1.06 (0.85-1.31)   | 1.00 (0.80-1.26) | 1.00 (0.80-1.28) |

264

265 \*p<0.05 indicating statistical significance.

266 Note: Model 1 adjusted for demographics; Model 2 adjusted for demographics and socioeconomic factors; Model 3 adjusted for

267 demographics, socioeconomic, and clinical factors. Model 4 adjusted for demographic, socioeconomic, clinical and psychosocial factors.

268 Covariates were pre-selected based on prior literature and clinical implications.

269

## 270 **Discussion**

271 In a cohort of young adults with AMI in the United States, we found a 1.3-fold higher  
272 readmission rate in unpartnered compared to married/partnered individuals. The association  
273 between marital/partner status and 1-year all-cause readmission attenuated and remained  
274 significant after adjusting for demographic and socioeconomic factors, but was not  
275 significant after further adjusting for clinical and psychosocial factors. Sex difference was not  
276 evident in the fully adjusted model.

277 Prior research generally supported improved survival and fewer recurrent events in  
278 married individuals compared to their unmarried counterparts within 1-year post AMI.(7–13)  
279 However, only a few studies investigated the impact of marital/partner status on post-event  
280 health outcomes beyond mortality among AMI survivors, with younger patients being  
281 underrepresented.(11–13) Our study addresses this important knowledge gap using  
282 adjudicated readmission data from a large nationwide cohort of young adults with AMI in the  
283 United States. Compared to an Israeli study of AMI patients with a mean age of 64 years,(11)

284 which found no unadjusted association between marital status and 30-day readmission  
285 (17.8% among married, 19.1% among nonmarried,  $p=0.28$ ), our study showed a higher  
286 unadjusted all-cause readmission rate within 1 year after AMI among unpartnered individuals  
287 compared to married/partnered. Differences in the results could be due to a longer follow up  
288 time in our study, and different participant characteristics (eg, younger age, different culture).

289 Previous studies that reported an independent association between marital status and  
290 AMI outcomes have not generally accounted for socioeconomic or psychosocial factors in  
291 their analyses.(11–13) However, mounting evidence has demonstrated that these factors are  
292 more powerful predictors of adverse outcomes following AMI than physical health  
293 indicators, especially in a younger population.(5) Our finding of the association being  
294 attenuated after adjusting for socioeconomic status and clinical factors supported the roles of  
295 both clinical (ie, diabetes, CVD history, COPD, length of stay) and socioeconomical  
296 components (ie, financial and employment status) in explaining the complicated relationship  
297 between marriage/partnership and health outcomes. Further, these findings align with  
298 prevailing theories that explain the mechanism of marriage protection. First, the marriage  
299 selection theory suggests that healthier people may be more likely to get and stay  
300 married.(25) In our study we also observed poorer health at baseline, including clinical,  
301 behavioral and psychosocial factors, among unpartnered compared to married/partnered  
302 individuals. Second, the social causation theory centered on the health benefits from spousal  
303 support with regard to treatment adherence, lifestyle changes, as well as greater  
304 socioeconomic resources, which make healthy behaviors affordable.(26,27) In our study,  
305 while further adjusting for psychosocial factors didn't substantially change the results,  
306 findings provided a more comprehensive risk factor profile for young adults with AMI,  
307 where unpartnered individuals were more likely to have depression, low social support, and  
308 high stress burden at baseline. Our results lend support to marriage selection and social



309 causation theories in a younger population with AMI, but should be interpreted with caution  
310 since our exploratory analysis can only generate associational evidence. Future research is  
311 encouraged to include a formal mediation analysis to understand the complex relationship  
312 and potential causal pathway associated with these findings.

313         Studies on sex differences in the impact of marital/partner status on cardiovascular  
314 outcomes have yielded mixed findings, with the majority of prior work supporting a greater  
315 marital benefit for men than women.(6,10,13,15) On the contrary, our study did not find such  
316 a sex difference in the association in a younger population. The potential mechanism for such  
317 findings is likely to be the offset of biological and psychosocial effects. Physiologically,  
318 women were protected against heart disease by sex hormones such as estrogen that reduces  
319 circulatory levels of harmful cholesterol, testosterone that increase the concentrations of low-  
320 density lipoprotein and inflammatory markers that affect atherosclerosis and stroke  
321 progression.(28) From a psychosocial perspective, however, women had distinct  
322 vulnerabilities, including unique sources of psychosocial stress and discrimination, increased  
323 perceived stress during adulthood, and twofold greater lifetime prevalence of depression and  
324 anxiety disorders compared with men.(29–31) This was also evident in the current study that  
325 unmarried women had the highest likelihood to have depression and high stress burden.  
326 Taken together, while our study found the impact of marital/partner status being equal for  
327 younger men and women, it might involve a mixture of biological and psychosocial effects  
328 that warrant further investigation.

329

### 330 ***Study Implications***

331         This study adds to the understanding of the association between marital/partner status  
332 and readmission outcomes up to 1 year post event in younger adults with AMI. Readmission  
333 presents a complex interaction between patients, community, environment, and healthcare

334 system, and is an important measure indicating health outcomes and disease burden. Usually  
335 perceived as a demographic variable, marital/partner status adds an important dimension of  
336 social support and is also an easily attainable indicator. Clinicians may consider incorporate  
337 patients' marital/partner status along with other socio-demographic factors into risk  
338 assessment and decision-making to create a more patient-centered practice. Our study may  
339 also inform potential interventions based on the social and psychological context of younger  
340 adults with AMI. For example, support groups or secondary prevention programs could  
341 widen participation of unpartnered individuals to improve their psychosocial well-being and  
342 recovery.

343

#### 344 ***Limitations***

345       Limitations of this study merit discussion. Self-reported readmission were validated  
346 with retroactive chart review but misclassification bias may still be present. Although our  
347 study included an extensive array of demographic, socioeconomic and clinical factors,  
348 residual confounding due to unmeasured characteristics that differ by marital/partner status  
349 may still bias the results. Our modeling approach generated only associational evidence  
350 instead of causation, therefore findings should be interpreted with caution. Participants  
351 enrolled in the VIRGO study may not reflect those who did not enroll in the study or  
352 hospitalized at other institutions.

353

#### 354 ***Conclusions***

355       Compared to young adults with AMI who are married/partnered, unpartnered  
356 individuals had 1.3 times higher risk of all-cause readmission within 1 year after hospital  
357 discharge. The association attenuated yet remained significant after adjusting for  
358 demographic and socioeconomic factors, but was not significant after further adjusting for

359 clinical and psychosocial factors. Sex difference was not evident in the association. Further  
360 study is needed to explore causal relationships.

361

362 **Acknowledgements:** None.

363

364 **Sources of Funding:** The VIRGO study was supported by a 4-year National Heart, Lung,  
365 and Blood Institute grant (No. 5R01HL081153). Dr Dreyer is supported by an American  
366 Heart Association (AHA) Transformational Project Award (#19TPA34830013). This project  
367 was additionally supported by a Canadian Institutes of Health Research project grant (PJT-  
368 159508).

369

370 **Disclosures:** Dr. Spertus discloses providing consultative services on patient-reported  
371 outcomes and evidence evaluation to Alnylam, AstraZeneca, Bayer, Merck, Janssen, Bristol  
372 Meyers Squibb, Edwards, Kineksia, 4DT Medical, Terumo, Cytokinetics, Imbria, and United  
373 Healthcare. He holds research grants from Bristol Meyers Squibb, Abbott Vascular and  
374 Janssen. He owns the copyright to the Seattle Angina Questionnaire, Kansas City  
375 Cardiomyopathy Questionnaire, and Peripheral Artery Questionnaire and serves on the Board  
376 of Directors for Blue Cross Blue Shield of Kansas City. No other authors report having any  
377 other disclosures to report.

378

379 **References:**

- 380 1. Wilmot KA, O’Flaherty M, Capewell S, Ford ES, Vaccarino V. Coronary Heart Disease  
381 Mortality Declines in the United States From 1979 Through 2011 Evidence for  
382 Stagnation in Young Adults, Especially Women. *Circulation*. 2015 Sep 15;132(11):997–  
383 1002.
- 384 2. Arora Sameer, Stouffer George A., Kucharska-Newton Anna M., Qamar Arman,  
385 Vaduganathan Muthiah, Pandey Ambarish, et al. Twenty Year Trends and Sex  
386 Differences in Young Adults Hospitalized With Acute Myocardial Infarction.  
387 *Circulation*. 2019 Feb 19;139(8):1047–56.
- 388 3. Khera R, Jain S, Pandey A, Agusala V, Kumbhani DJ, Das SR, et al. Comparison of  
389 Readmission Rates After Acute Myocardial Infarction in 3 Patient Age Groups (18 to 44,  
390 45 to 64, and  $\geq 65$  Years) in the United States. *The American Journal of Cardiology*. 2017  
391 Nov 15;120(10):1761–7.
- 392 4. Sawano M, Lu Y, Caraballo C, Mahajan S, Dreyer R, Lichtman JH, et al. Sex Difference  
393 in Outcomes of Acute Myocardial Infarction in Young Patients. *Journal of the American*  
394 *College of Cardiology*. 2023 May 9;81(18):1797–806.
- 395 5. Dreyer RP, Raparelli V, Tsang SW, D’Onofrio G, Lorenze N, Xie CF, et al.  
396 Development and Validation of a Risk Prediction Model for 1-Year Readmission Among  
397 Young Adults Hospitalized for Acute Myocardial Infarction. *Journal of the American*  
398 *Heart Association*. 2021 Sep 21;10(18):e021047.
- 399 6. Wong CW, Kwok CS, Narain A, Gulati M, Mihalidou AS, Wu P, et al. Marital status and  
400 risk of cardiovascular diseases: a systematic review and meta-analysis. *Heart*. 2018  
401 Dec;104(23):1937–48.
- 402 7. Chandra V, Szklo M, Goldberg R, Tonascia J. The impact of marital status on survival  
403 after an acute myocardial infarction: a population-based study. *American Journal of*  
404 *Epidemiology*. 1983 Mar;117(3):320–5.
- 405 8. Hadi Khafaji HAR, Al Habib K, Asaad N, Singh R, Hersi A, Falaeh HA, et al. Marital  
406 Status and Outcome of Patients Presenting with Acute Coronary Syndrome: An  
407 Observational Report. *Clin Cardiol*. 2012 Jun 27;35(12):741–8.
- 408 9. Consuegra-Sánchez L, Melgarejo-Moreno A, Jaulent-Huertas L, Díaz-Pastor Á,  
409 Escudero-García G, Vicente-Gilabert M, et al. Unraveling the relation between marital  
410 status and prognosis among myocardial infarction survivors: Impact of being widowed on  
411 mortality. *International Journal of Cardiology*. 2015 Apr 15;185:141–3.
- 412 10. Quinones PA, Kirchberger I, Heier M, Kuch B, Trentinaglia I, Mielck A, et al. Marital  
413 status shows a strong protective effect on long-term mortality among first acute  
414 myocardial infarction-survivors with diagnosed hyperlipidemia – findings from the  
415 MONICA/KORA myocardial infarction registry. *BMC Public Health*. 2014 Jan 30;14:98.
- 416 11. Marcus G, Litovchik I, Pereg D, Beigel R, Sholmo N, Iakobishvili Z, et al. Impact of  
417 Marital Status on the Outcome of Acute Coronary Syndrome: Results From the Acute

- 418 Coronary Syndrome Israeli Survey. *Journal of the American Heart Association*. 2019 Jul  
419 16;8(14):e011664.
- 420 12. Ohm J, Skoglund PH, Discacciati A, Sundström J, Hambraeus K, Jernberg T, et al.  
421 Socioeconomic status predicts second cardiovascular event in 29,226 survivors of a first  
422 myocardial infarction. *European Journal of Preventive Cardiology*. 2018 Jun  
423 1;25(9):985–93.
- 424 13. Barbash IM, Gaglia MA, Torguson R, Minha S, Satler LF, Pichard AD, et al. Effect of  
425 marital status on the outcome of patients undergoing elective or urgent coronary  
426 revascularization. *American Heart Journal*. 2013 Oct 1;166(4):729–36.
- 427 14. Molloy GJ, Stamatakis E, Randall G, Hamer M. Marital status, gender and cardiovascular  
428 mortality: Behavioural, psychological distress and metabolic explanations. *Soc Sci Med*.  
429 2009 Jul;69(2):223–8.
- 430 15. Wang Y, Jiao Y, Nie J, O’Neil A, Huang W, Zhang L, et al. Sex differences in the  
431 association between marital status and the risk of cardiovascular, cancer, and all-cause  
432 mortality: a systematic review and meta-analysis of 7,881,040 individuals. *Glob Health  
433 Res Policy*. 2020 Feb 28;5:4.
- 434 16. Lichtman JH, Lorenze NP, D’Onofrio G, Spertus JA, Lindau ST, Morgan TM, et al.  
435 Variation in Recovery: Role of Gender on Outcomes of Young AMI Patients (VIRGO)  
436 Study Design. *Circulation: Cardiovascular Quality and Outcomes*. 2010 Nov;3(6):684–  
437 93.
- 438 17. Kroenke K, Spitzer RL, Williams JB. The PHQ-9: validity of a brief depression severity  
439 measure. *J Gen Intern Med*. 2001 Sep;16(9):606–13.
- 440 18. Enhancing Recovery in Coronary Heart Disease Patients (ENRICHD): Study design and  
441 methods. *American Heart Journal*. 2000 Jan 1;139(1):1–9.
- 442 19. Vaglio J, Conard M, Poston WS, O’Keefe J, Haddock CK, House J, et al. Testing the  
443 performance of the ENRICHD Social Support Instrument in cardiac patients. *Health Qual  
444 Life Outcomes*. 2004 May 13;2:24.
- 445 20. Cohen S, Kamarck T, Mermelstein R. A global measure of perceived stress. *J Health Soc  
446 Behav*. 1983 Dec;24(4):385–96.
- 447 21. Harris PA, Taylor R, Minor BL, Elliott V, Fernandez M, O’Neal L, et al. The REDCap  
448 Consortium: Building an International Community of Software Platform Partners. *J  
449 Biomed Inform*. 2019 Jul;95:103208.
- 450 22. White IR, Royston P, Wood AM. Multiple imputation using chained equations: Issues  
451 and guidance for practice. *Stat Med*. 2011 Feb 20;30(4):377–99.
- 452 23. Raparelli V, Pilote L, Dang B, Behlouli H, Dziura JD, Bueno H, et al. Variations in  
453 Quality of Care by Sex and Social Determinants of Health Among Younger Adults With  
454 Acute Myocardial Infarction in the US and Canada. *JAMA Network Open*. 2021 Oct  
455 20;4(10):e2128182.

- 456 24. Raparelli V, Benea D, Nunez Smith M, Behloul H, Murphy TE, D’Onofrio G, et al.  
457 Impact of Race on the In-Hospital Quality of Care Among Young Adults With Acute  
458 Myocardial Infarction. *Journal of the American Heart Association*. 2021 Sep  
459 7;10(17):e021408.
- 460 25. Joung IMA, van de Mheen HD, Stronks K, van Poppel FWA, Mackenbach JP. A  
461 longitudinal study of health selection in marital transitions. *Social Science & Medicine*.  
462 1998 Feb 1;46(3):425–35.
- 463 26. Burman B, Margolin G. Analysis of the association between marital relationships and  
464 health problems: An interactional perspective. *Psychological Bulletin*. 1992;112(1):39–  
465 63.
- 466 27. Goldman N. Marriage selection and mortality patterns: Inferences and fallacies.  
467 *Demography*. 1993 May 1;30(2):189–208.
- 468 28. Shufelt C, Pacheco C, Tweet MS, Miller VM. Sex-specific physiology and  
469 cardiovascular disease. *Adv Exp Med Biol*. 2018;1065:433–54.
- 470 29. Bale TL, Epperson CN. Sex differences and stress across the lifespan. *Nat Neurosci*.  
471 2015 Oct;18(10):1413–20.
- 472 30. Medina-Inojosa JR, Vinnakota S, Garcia M, Arciniegas Calle M, Mulvagh SL, Lopez-  
473 Jimenez F, et al. Role of Stress and Psychosocial Determinants on Women’s  
474 Cardiovascular Risk and Disease Development. *Journal of Women’s Health*. 2019  
475 Apr;28(4):483–9.
- 476 31. Gaffey AE, Gathright EC, Fletcher LM, Goldstein CM. Screening for Psychological  
477 Distress and Risk of Cardiovascular Disease and Related Mortality: A SYSTEMATIZED  
478 REVIEW, META-ANALYSIS, AND CASE FOR PREVENTION. *Journal of*  
479 *Cardiopulmonary Rehabilitation and Prevention*. 2022 Nov;42(6):404–15.
- 480

## **Supporting Information Captions**

### **Appendix STROBE Statement Checklist**

**eTable 1. Multivariable Cox regression models output using multiple imputed data**

**eTable 2. Sex-specific Cox regression model output**

**eTable 3. Multivariable Fine-Grey models (cardiac readmission)**
